# Supplementary material for: Association of Genetic Variants in ANGPT/TEK and VEGF/VEGFR with Progression and Survival in Head and Neck Squamous Cell Carcinoma Treated with Radiotherapy or Radiochemotherapy
Source: PubMed Central journal article supplement (PMC7352333; doi:10.3390/cancers12061506), 2020-06-09
Supplement: cancers-12-01506-s001.pdf [file cancers-12-01506-s001.pdf]

## Supplementary Materials: Association of Genetic Variants in ANGPT/TEK and VEGF/VEGFR with Progression and Survival in Head and Neck Squamous Cell Carcinoma Treated with Radiotherapy or Radiochemotherapy

Dorota Butkiewicz, Agnieszka Gdowicz-Kłosok, Małgorzata Krześniak, Tomasz Rutkowski, Aleksandra Krzywon, Alexander Jorge Cortez, Iwona Domińczyk and Krzysztof Składowski

Table S1. SNPs selected for the study and the genotype distribution.

| Gene   | SNP       | Polymorphic Site/SNP<br>Common Name | Location  | Genotype<br>Distribution <sup>a</sup> | MAF  | HWE<br><i>p</i> -Value |
|--------|-----------|-------------------------------------|-----------|---------------------------------------|------|------------------------|
| VEGF   | rs2010963 | -634 G > C                          | 5'UTR     | 201/181/40                            | 0.31 | 0.94                   |
|        | rs699947  | -2578 C > A                         | promoter  | 117/204/93                            | 0.47 | 0.82                   |
|        | rs3025039 | 936 C > T                           | 3'UTR     | 281/133/6                             | 0.17 | 0.03                   |
| VEGFR1 | rs9582036 | -834 A > C                          | intron 27 | 209/169/38                            | 0.29 | 0.65                   |
|        | rs7996030 | c.3636-273 G > A                    | intron 29 | 286/114/19                            | 0.18 | 0.09                   |
| VEGFR2 | rs2071559 | -906 T > C                          | promoter  | 107/215/100                           | 0.49 | 0.69                   |
|        | rs1870377 | His472Gln, 1416 T > A               | exon 11   | 223/166/28                            | 0.27 | 0.70                   |
| ANGPT1 | rs2507800 | 1414 T > A                          | 3'UTR     | 187/184/50                            | 0.34 | 0.65                   |
|        | rs1954727 | 949 G > C                           | 3'UTR     | 144/180/97                            | 0.44 | 0.006                  |
| ANGPT2 | rs3739391 | -79 G > A                           | 5'UTR     | 312/101/4                             | 0.13 | 0.18                   |
|        | rs3020221 | Gln245Gln, 1087 C > T               | exon 4    | 182/180/60                            | 0.36 | 0.16                   |
| TEK    | rs639225  | Ser654Ser, 1962 A > G               | exon 13   | 120/196/105                           | 0.48 | 0.16                   |

SNP, single nucleotide polymorphism; MAF, minor allele frequency in the studied group; HWE, Hardy-Weinberg equilibrium; UTR, untranslated region; <sup>a</sup> The genotype distribution shown in order of common homozygote/heterozygote/variant homozygote.

**Table S2.** Stepwise multiple regression analysis for the effect of genotype combinations on OS and LRFS in the whole group, and on OS and NRFS in the combination treatment subgroup (RT + CHT).

| All Patients                   |                  |                       | RT + CHT Subgroup                       |                   |                        |
|--------------------------------|------------------|-----------------------|-----------------------------------------|-------------------|------------------------|
| OS                             |                  |                       | OS                                      |                   |                        |
| Variables                      | HR (95% CI)      | <i>p</i>              | Variables                               | HR (95% CI)       | <i>p</i>               |
| rs3739391/rs3020221/rs2010963: |                  |                       | rs3739391/rs3020221/rs639225/rs2010963: |                   |                        |
| 2–3 risk genotypes             | 1.76 (1.22–2.54) | 0.003                 | 1–2 risk genotypes                      | 2.92 (1.15–7.40)  | 0.024                  |
| Alcohol: ever                  | 1.46 (1.02–2.09) | 0.037                 | 3–4 risk genotypes                      | 7.63 (2.77–21.06) | 8.7 × 10 <sup>−5</sup> |
| Stage N1–N3                    | 1.66 (1.20–2.31) | 0.002                 | Alcohol: ever                           | 2.24 (1.25–4.01)  | 0.007                  |
| HPSCC                          | 1.48 (1.00–2.19) | 0.049                 | HPSCC                                   | 2.39 (1.46–3.93)  | 5.6 × 10 <sup>−4</sup> |
| Local recurrence: yes          | 4.56 (3.30–6.32) | <1 × 10 <sup>−6</sup> | Local recurrence: yes                   | 5.21 (3.17–8.57)  | <1 × 10 <sup>−6</sup>  |
| Regional recurrence: yes       | 1.60 (1.08–2.36) | 0.019                 | Regional recurrence: yes                | 1.98 (1.21–3.24)  | 0.007                  |
| Metastasis: yes                | 1.52 (1.02–2.26) | 0.039                 | SPC: yes                                | 1.93 (1.02–3.66)  | 0.045                  |
| SPC: yes                       | 2.18 (1.46–3.26) | 0.0001                |                                         |                   |                        |
| LRFS                           |                  |                       | NRFS                                    |                   |                        |
| Variables                      | HR (95% CI)      | <i>p</i>              | Variables                               | HR (95% CI)       | <i>p</i>               |
| rs699947/rs1870377:            |                  |                       | rs699947/rs2071559:                     |                   |                        |
| 2 risk genotypes               | 1.82 (1.10–3.01) | 0.020                 | 1 risk genotype                         | 4.94 (1.17–20.89) | 0.030                  |
| Stage T3–T4                    | 2.36 (1.55–3.61) | 7 × 10 <sup>−5</sup>  | 2 risk genotypes                        | 8.51 (1.92–37.69) | 0.005                  |
| Non-OPSCC                      | 2.49 (1.54–4.00) | 0.0002                |                                         |                   |                        |

OS, overall survival; LRFS, local recurrence-free survival; NRFS, nodal recurrence-free survival; RT + CHT, combination therapy subgroup; HR, hazard ratio; CI, confidence interval; HPSCC, hypopharyngeal squamous cell carcinoma; SPC, second primary cancer; Non-OPSCC, non-opharyngeal squamous cell carcinoma.

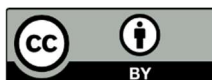

© 2020 by the authors. Licensee MDPI, Basel, Switzerland. This article is an open access article distributed under the terms and conditions of the Creative Commons Attribution (CC BY) license (<http://creativecommons.org/licenses/by/4.0/>).
